# Supplementary material for: Self-ZIF template-directed synthesis of a CoS nanoflake array as a Janus electrocatalyst for overall water splitting
Source: Royal Society of Chemistry journal article supplement (doi:10.1039/c9qi00554d), 2019-01-01
Supplement: c9qi00554d1.pdf [file c9qi00554d1.pdf]

## Electronic Supplementary Information

### Experimental

#### *Materials*

Carbon cloth (CC) was used as the substrate. Cobalt nitrate hexahydrate ( $\text{Co}(\text{NO}_3)_2 \cdot 6\text{H}_2\text{O}$ ,  $\geq 99\%$ ) and sodium sulfide ( $\text{Na}_2\text{S} \cdot 9\text{H}_2\text{O}$ ,  $\geq 98\%$ ) were obtained from Aladdin Industrial Corporation. 2-Methylimidazole ( $\text{C}_4\text{H}_6\text{N}_2$ ,  $\geq 99.0\%$ ) was received from Sinopharm Chemical Reagent Co. Ltd. All chemicals employed were analytical grade. Experimental water was deionized water.

#### *Synthesis of Co-MOF Nanoflakes Array on CC*

At first, the bare CC was pretreated by immersing in concentrated nitric acid and maintaining at 100 °C for 3 h in a Teflon-lined stainless steel autoclave. Co-MOF NF/CC was synthesized by a simple precipitation method. Specifically, 0.582 g of  $\text{Co}(\text{NO}_3)_2 \cdot 6\text{H}_2\text{O}$  and 1.312 g of 2-methylimidazole ( $\text{C}_4\text{H}_6\text{N}_2$ ) were dissolved respectively in 40 mL of deionized water to form solution A and solution B. After the solution B being rapidly added into the solution A to form a homogeneous suspension, a piece of pretreated CC substrate ( $2 \times 3 \text{ cm}^2$ ) was quickly immersed in the above mixed solution. After reaction for 4 h at the room temperature, the material was taken out, cleaned with deionized water and dried at 60 °C overnight.

#### *Synthesis of CoS Nanoflakes Array on CC*

Firstly, the  $\text{Co}_3\text{O}_4$  NF/CC was obtained by annealing the prepared Co-MOF NF/CC in a tube furnace at 400 °C for 2 h with the heating rate of 2 °C  $\text{min}^{-1}$  in air. Then, the preparation of CoS NF/CC was carried out through hydrothermal ion-exchange method. Concretely, 0.1 M  $\text{Na}_2\text{S} \cdot 9\text{H}_2\text{O}$  aqueous solution served as reaction solution with a piece of obtained  $\text{Co}_3\text{O}_4$  NF/CC as precursor. After reaction at 120 °C for 9 h and naturally cooled down to ambient temperature, the CoS NF/CC was synthesized, then washed thoroughly with water and dried at 60 °C in a vacuum environment. The loading masses of  $\text{Co}_3\text{O}_4$  and CoS nanoflakes on CC are  $\sim 0.32$  and  $\sim 0.72 \text{ mg cm}^{-2}$ , respectively.

#### *Synthesis of $\text{RuO}_2$*

---

RuO<sub>2</sub> powder was obtained in the light of a previously reported method. Specifically, 50 mL RuCl<sub>3</sub>·3H<sub>2</sub>O solution (0.1 M) and 15 mL KOH (1.0 M) were mixed and stirred gently at 100 °C for 45 min. Then, the precipitation was collected by centrifugation for 10 minutes at the rotation speed of 10000 r min<sup>-1</sup>, and washed with deionized water for three times. Finally, the dried collection was annealed at 300 °C for 3 h in the air. Afterwards, 0.01 g of synthesized RuO<sub>2</sub> powder was dispersed in 0.5 mL ethanol/water/Nafion (v:v:v = 12:12:1) solution to form uniformly dispersed suspension with sonication for 30 min. Subsequently, 9 μL of the ink was dropped on CC (0.25 cm<sup>2</sup>) and dried at room temperature.

### ***Physical characterization***

Scanning electron microscope (SEM), elemental mappings test and energy-dispersive spectrometry (EDS) were performed on Hitachi S-4800 operated at an accelerating voltage of 10 kV. Transmission electron microscopy (TEM), high-resolution TEM (HRTEM) and corresponding elemental mappings images were obtained by a Hitachi H-8100 electron microscopy (Hitachi, Tokyo, Japan) operated at 200 kV. X-ray diffraction (XRD) dates were gained from a Bruker D8 Advanced Diffractometer System with Cu Kα (1.5418 Å) as the radiation source (40 kV, 40 mA). X-ray photoelectron spectroscopy (XPS) measurements were taken on an ESCALABMK II X-ray photoelectron spectrometer using Mg as the exciting source. The BET analysis was performed with the N<sub>2</sub> adsorption/desorption isotherms at 77 K on a Micromeritics ASAP 2020 instrument.

### ***Electrochemical measurements***

Electrochemical measurements were conducted on a computer-controlled electrochemical workstation (CHI660E, CH Instruments, Inc., Shanghai) with a three-electrode configuration. The mercuric oxide electrode (MOE), graphite plate, and as-prepared catalytic materials acted as the reference electrode, counter electrode and working electrode, respectively. The area of working electrode is 0.25 cm<sup>2</sup> in all experiments. The electrocatalytic performance was evaluated by steady-state linear sweep voltammograms in 1.0 M KOH solution at a sweep rate of 2 mV s<sup>-1</sup>. Measured voltage results were converted according to the equation:  $E$  (RHE: reversible

---

hydrogen electrode) =  $E$  (MOE) + 0.9254 V in 1.0 M KOH. The Tafel plots were obtained by overpotential ( $\eta$ ) vs. log current ( $\log |j|$ ). The Tafel slope ( $b$ ) was calculated by fitting the linear portion of the Tafel plots according to the Tafel equation [ $\eta = b \log (j) + a$ ].  $iR$  corrected is on the basis of the equation:  $E = E_m - iR_s$  (where  $E$  is the corrected potential,  $E_m$  is the measured potential,  $i$  is the current density and  $R_s$  is the resistance of the solution). The electrochemical double-layer capacitance ( $C_{dl}$ ) was calculated by the equation of  $C_{dl} = I/\nu$  from the CV curves in a potential range of 0.3–0.4 V without redox process, wherein  $I$  is the charging current ( $\text{mA cm}^{-2}$ ), and  $\nu$  is the scan rate ( $\text{mV s}^{-1}$ ). Electrochemical impedance spectroscopy (EIS) measurements were carried out by applying an AC voltage of 0.60 V with 5 mV amplitude in the frequency range from 100 kHz to 0.005 Hz. In addition, the obtained samples served as both the anode and the cathode to form a single-compartment cell to conduct overall water electrolysis with linear sweep voltammetry recorded in the voltage range from 2.0 V to 1.0 V. Multi-step and long-term chronopotentiometric measurements were employed to study the stability of catalysts.

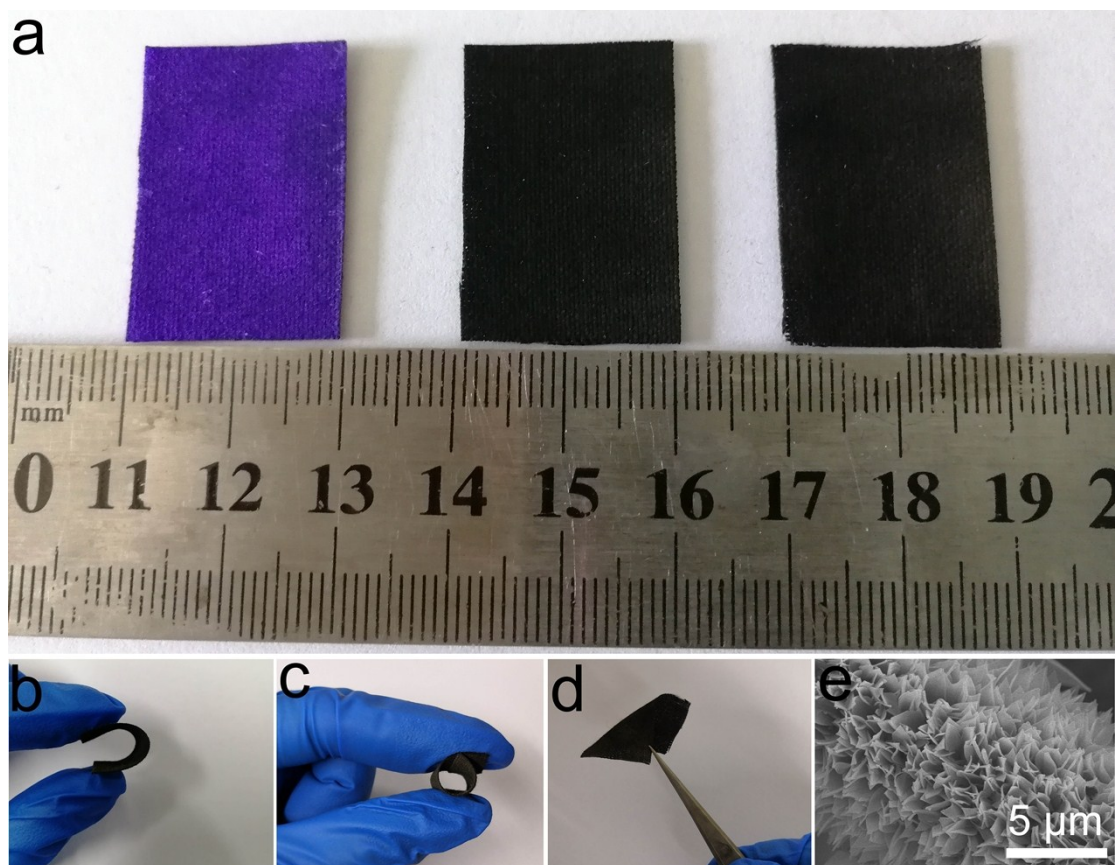

**Fig. S1.** (a) Optical image of Co-MOF NF/CC (left),  $\text{Co}_3\text{O}_4$  NF/CC (middle), and CoS NF/CC (right). (b-d) Optical images of CoS NF/CC bended at different angles. (e) SEM image of CoS NF/CC after being bended at different angles.

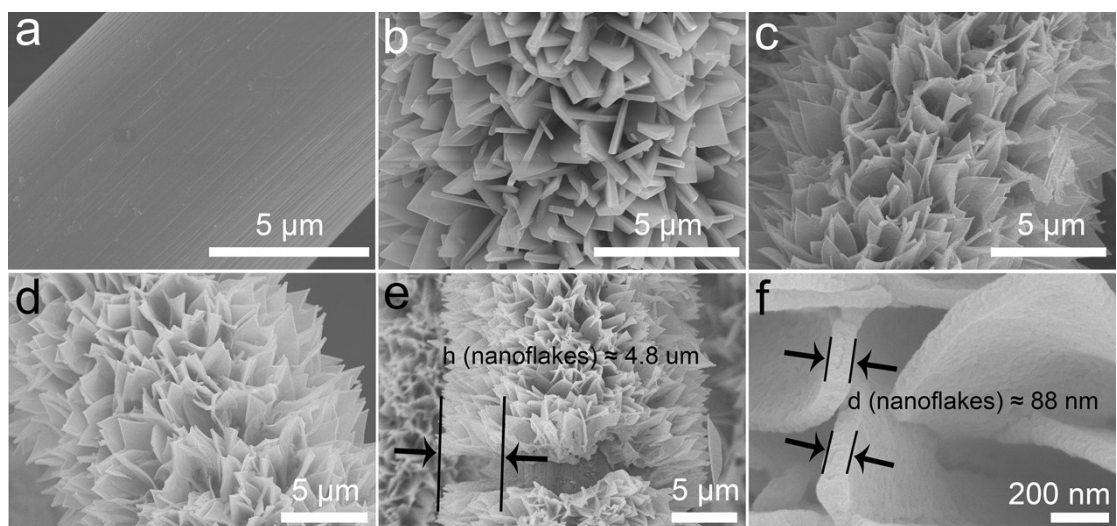

**Fig. S2.** SEM images of the (a) bare CC, (b) Co-MOF NF/CC, (c) Co<sub>3</sub>O<sub>4</sub> NF/CC and (d) CoS NF/CC. (e) The height of CoS nanoflakes on CC. (f) The thickness of CoS nanoflakes.

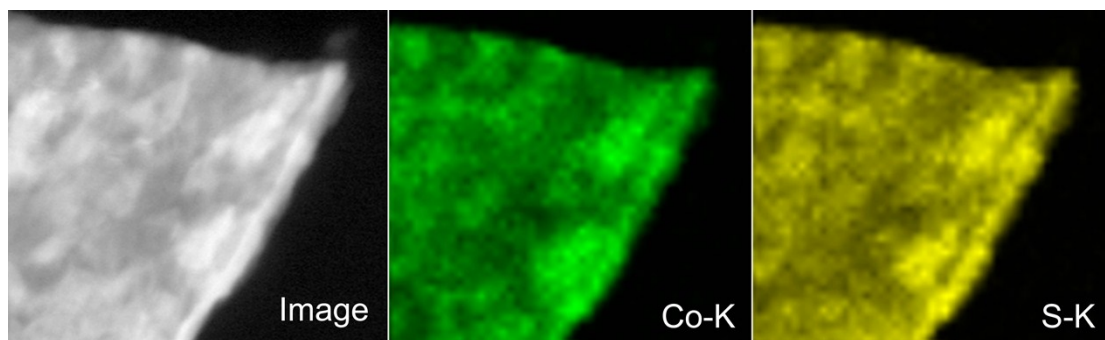

**Fig. S3.** Elemental mapping images for the CoS nanoflake.

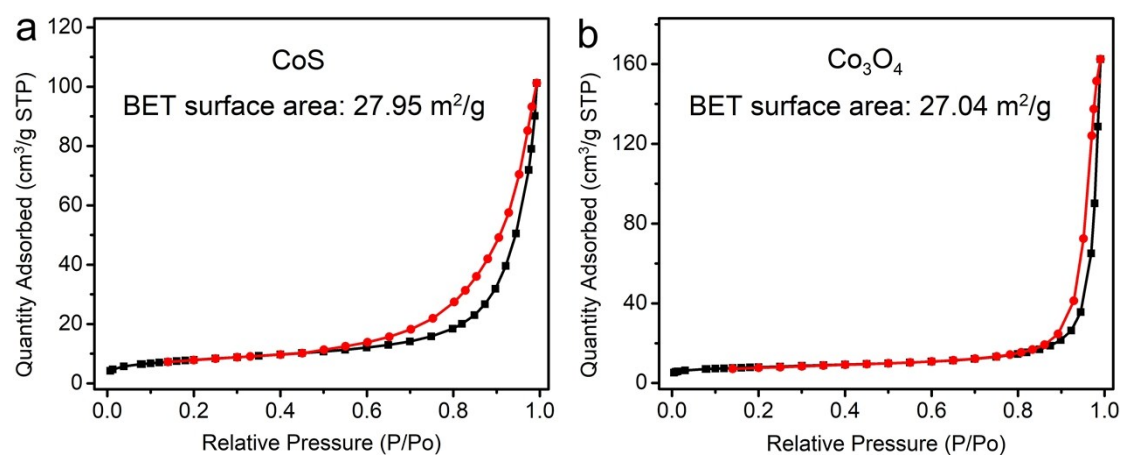

**Fig. S4.**  $N_2$  adsorption/desorption isotherms obtained from the BET measurements of (a)  $CoS$  and (b)  $Co_3O_4$  nanoflakes powders.

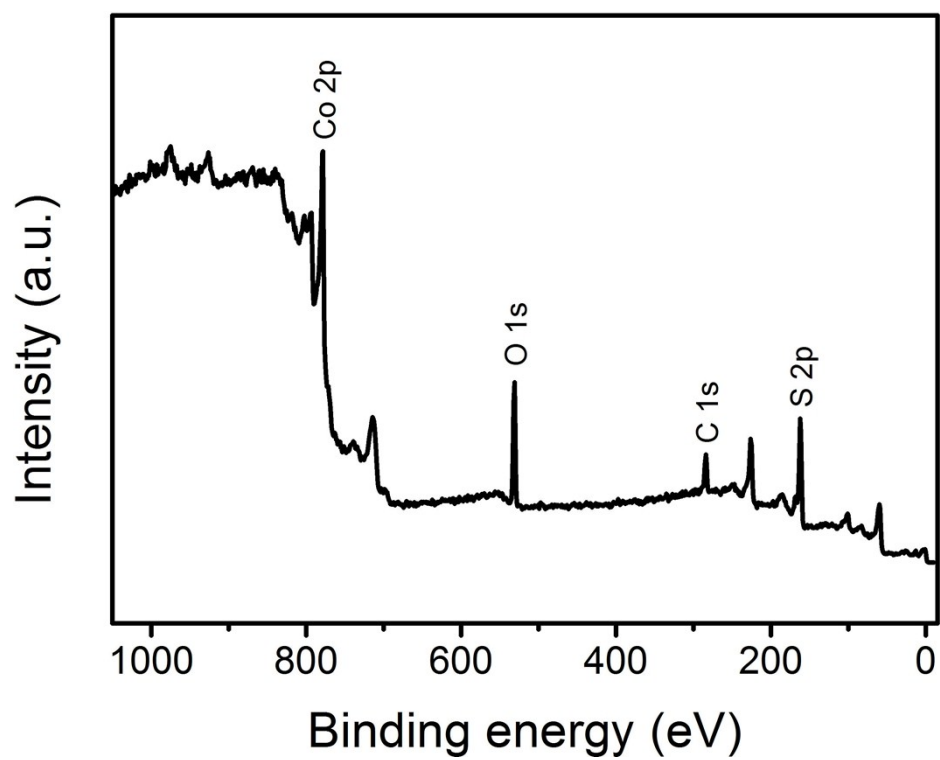

**Fig. S5.** XPS survey spectrum of CoS NF/CC.



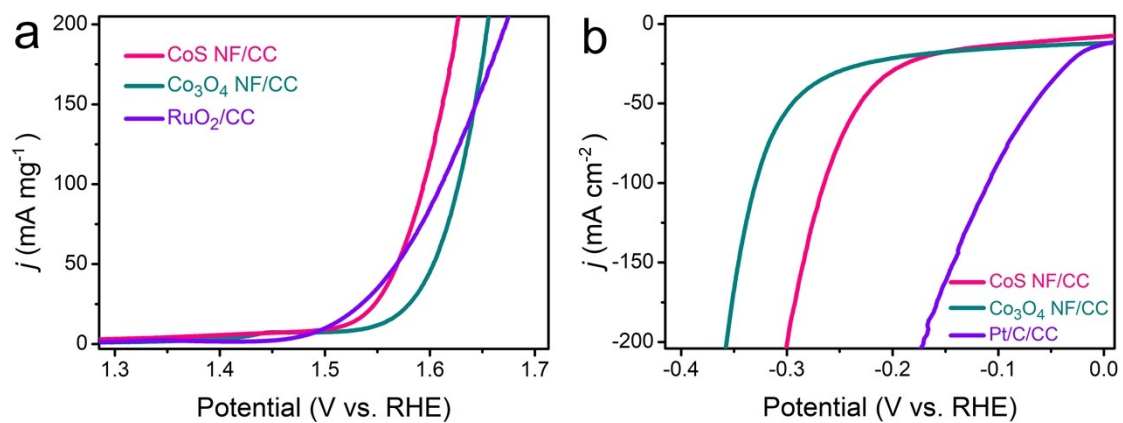

**Fig. S6.** (a) The mass-normalized OER performances of the CoS NF/CC,  $\text{Co}_3\text{O}_4$  NF/CC and  $\text{RuO}_2/\text{CC}$ . (b) The mass-normalized HER performances of the CoS NF/CC,  $\text{Co}_3\text{O}_4$  NF/CC and Pt/C/CC.

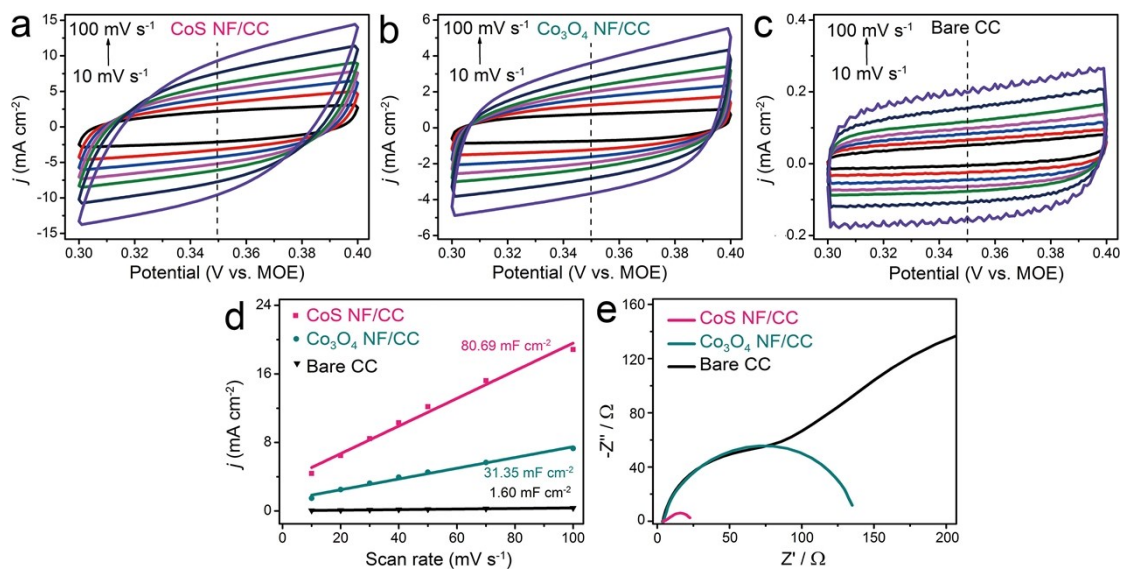

**Fig. S7.** Typical cyclic voltammograms of (a) CoS NF/CC, (b) Co<sub>3</sub>O<sub>4</sub> NF/CC and (c) bare CC with various scan rates (10–100 mV s<sup>-1</sup>) in the region of 0.3–0.4 V (vs. MOE). (d) The capacitive current density ( $\Delta j$ ) at 0.35 V (vs. MOE) as a function of scan rate in the range of 0.3–0.4 V for different electrodes in 1.0 M KOH. (e) The Nyquist plots of CoS NF/CC, Co<sub>3</sub>O<sub>4</sub> NF/CC and bare CC measured in 1.0 M KOH.

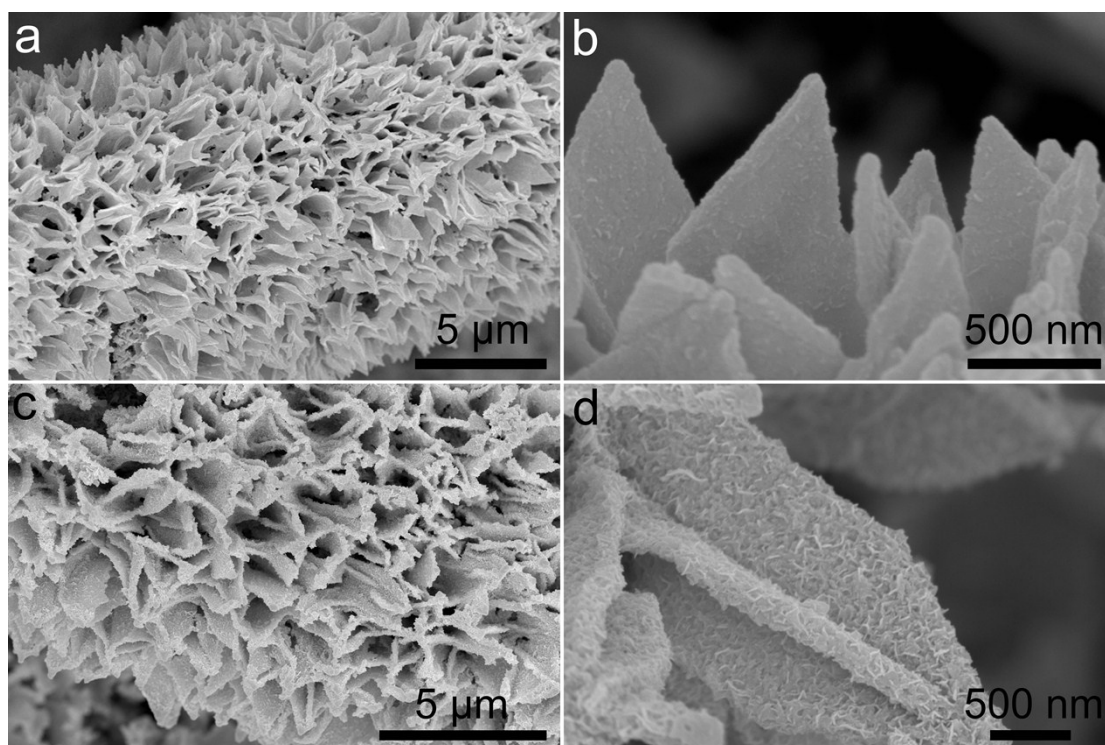

**Fig. S8.** SEM images of the CoS NF/CC after long-term (a,b) HER and (c,d) OER catalysis at  $100 \text{ mA cm}^{-2}$ .

**Table S1.** Comparison of the OER activity for the synthesized CoS NF/CC with several recently reported highly active electrocatalysts in alkaline solution.

| Catalytic material                                                    | Current density<br>(mA cm <sup>-2</sup> ) | Overpotential<br>(mV) | Ref.             |
|-----------------------------------------------------------------------|-------------------------------------------|-----------------------|------------------|
| <b>CoS NF/CC</b>                                                      | <b>10</b>                                 | <b>310</b>            | <b>This work</b> |
| Ni@CoO@CoNC                                                           | 10                                        | 309                   | 1                |
| S,N-CNTs/CoS <sub>2</sub> @Co                                         | 10                                        | 340                   | 2                |
| NiCo <sub>2</sub> S <sub>4</sub>                                      | 10                                        | 337                   | 3                |
| Ni <sub>x</sub> Co <sub>3-x</sub> O <sub>4</sub>                      | 10                                        | 337                   | 4                |
| Co <sub>9</sub> S <sub>8</sub> /N,S-CNS                               | 10                                        | 350                   | 5                |
| Co <sub>9</sub> S <sub>8</sub> @MoS <sub>2</sub>                      | 10                                        | 342                   | 6                |
| Au@CoSe <sub>2</sub>                                                  | 10                                        | 430                   | 7                |
| NiO/Ni                                                                | 10                                        | 345                   | 8                |
| β-Ni(OH) <sub>2</sub>                                                 | 10                                        | 340                   | 9                |
| Co-Cu <sub>7</sub> S <sub>4</sub> -0.035                              | 10                                        | 320                   | 10               |
| Fe <sub>3</sub> O <sub>4</sub> @Co <sub>9</sub> S <sub>8</sub> /rGO-2 | 10                                        | 320                   | 11               |
| NiCoS-3 polyhedron                                                    | 10                                        | 320                   | 12               |
| Zn <sub>0.1</sub> Co <sub>0.9</sub> Se <sub>2</sub>                   | 10                                        | 340                   | 13               |
| Co <sub>1-x</sub> S@rGO                                               | 10                                        | 310                   | 14               |
| Co <sub>9</sub> S <sub>8</sub> @NOSC-900                              | 10                                        | 330                   | 15               |
| Mn-Co oxyphosphide                                                    | 10                                        | 320                   | 16               |

**Table S2.** Comparison of the HER activity for the synthesized CoS NF/CC with several recently reported highly active electrocatalysts in alkaline solution.

| Catalytic material                            | Current density<br>(mA cm <sup>-2</sup> ) | Overpotential (mV) | Ref.             |
|-----------------------------------------------|-------------------------------------------|--------------------|------------------|
| <b>CoS NF/CC</b>                              | <b>50</b>                                 | <b>247</b>         | <b>This work</b> |
| Ni@CoO@CoNC                                   | 50                                        | ~280               | 1                |
| CoNi <sub>2</sub> Se <sub>4</sub> @Au/glass   | 50                                        | >300               | 17               |
| Ni <sub>3</sub> S <sub>2</sub> -NGQDs/NF      | 50                                        | ~305               | 18               |
| Ni <sub>3</sub> Se <sub>2</sub> nanoforest/NF | 50                                        | ~247               | 19               |
| Ni <sub>3</sub> S <sub>2</sub> particles      | 10                                        | 335                | 20               |
| Ni/NC                                         | 20                                        | ~249               | 21               |
| Co/N-doped carbon                             | 10                                        | 260                | 22               |
| Co-S/CP                                       | 10                                        | 357                | 23               |
| CP/CTs/Co-S                                   | 30                                        | ~258               |                  |
| CoP nanowire array                            | 50                                        | ~375               | 24               |
| Ni <sub>3</sub> S <sub>2</sub> /NF            | 20                                        | ~290               | 25               |
| CoO <sub>x</sub> @CN                          | 20                                        | ~280               | 26               |
| CoSe/NiFe LDH                                 | 10                                        | 260                | 27               |
| NiO/NF                                        | 30                                        | ~255               | 28               |

**Table S3.** Comparison of the electrocatalysis activity for overall water splitting of the synthesized CoS NF/CC with several recently reported highly active electrocatalysts in alkaline solution.

| Catalytic material                                                                               | Current density<br>(mA cm <sup>-2</sup> ) | Voltage (V) | Ref.             |
|--------------------------------------------------------------------------------------------------|-------------------------------------------|-------------|------------------|
| <b>CoS NF/CC</b>                                                                                 | <b>10</b>                                 | <b>1.72</b> | <b>This work</b> |
| Ni <sub>x</sub> Co <sub>3-x</sub> O <sub>4</sub> /NiCo/NiCoO <sub>x</sub>                        | 10                                        | 1.75        | 4                |
| Co-P/NC/CC                                                                                       | 10                                        | 1.77        | 14               |
| CP/CTS/Co-S                                                                                      | 10                                        | 1.74        | 23               |
| amorphous Co <sub>2</sub> B                                                                      | 10                                        | 1.81        | 29               |
| Ni <sub>0.85</sub> Se/GS                                                                         | 10                                        | 1.73        | 30               |
| V/NF                                                                                             | 10                                        | 1.74        | 31               |
| Co <sub>3</sub> O <sub>4</sub>                                                                   | 10                                        | 1.91        | 32               |
| Mo <sub>2</sub> C@CS                                                                             | 10                                        | 1.73        | 33               |
| CoO/MoO <sub>x</sub>                                                                             | 10                                        | 1.72        | 34               |
| Ni(OH) <sub>2</sub> /NiSe <sub>2</sub>                                                           | 10                                        | 1.78        | 35               |
| NiCo <sub>2</sub> O <sub>4</sub>   Ni <sub>0.33</sub> Co <sub>0.67</sub> S <sub>2</sub> /Ti foil | 10                                        | 1.72        | 36               |
| NiSe/Ni                                                                                          | 20                                        | 1.75        | 37               |
| Ni <sub>3</sub> S <sub>2</sub> on nickel foam                                                    | 10                                        | 1.73        | 38               |
| NiCo-LDH                                                                                         | 10                                        | 1.73        | 39               |
| NiCo <sub>2</sub> S <sub>4</sub> nanowires array                                                 | 20                                        | 1.85        | 40               |

---

## Reference

- [1] G. Cai, W. Zhang, L. Jiao, S.-H. Yu and H.-L. Jiang, Template-directed growth of well-aligned MOF arrays and derived self-supporting electrodes for water splitting. *Chem*, 2017, **2**, 791-802.
- [2] J.-Y. Wang, T. Ouyang, N. Li, T. Ma and Z.-Q. Liu, S,N co-doped carbon nanotube-encapsulated core-shelled  $\text{CoS}_2@\text{Co}$  nanoparticles: efficient and stable bifunctional catalysts for overall water splitting. *Sci. Bull.*, 2018, **63**, 1130-1140.
- [3] J. Jiang, C. Yan, X. Zhao, H. Luo, Z. Xue and T. Mu, A PEGylated deep eutectic solvent for controllable solvothermal synthesis of porous  $\text{NiCo}_2\text{S}_4$  for efficient oxygen evolution reaction. *Green Chem.*, 2017, **19**, 3023-3031.
- [4] X. Yan, K. Li, L. Lyu, F. Song, J. He, D. Niu, L. Liu, X. Hu and X. Chen, From water oxidation to reduction: transformation from  $\text{Ni}_x\text{Co}_{3-x}\text{O}_4$  nanowires to  $\text{NiCo}/\text{NiCoO}_x$  heterostructures. *ACS Appl. Mater. Interfaces*, 2016, **8**, 3208-3214.
- [5] C. Wu, Y. Zhang, D. Dong, H. Xie and J. Li,  $\text{Co}_9\text{S}_8$  nanoparticles anchored on nitrogen and sulfur dual-doped carbon nanosheets as highly efficient bifunctional electrocatalyst for oxygen evolution and reduction reactions. *Nanoscale*, 2017, **9**, 12432-12440.
- [6] J. Bai, T. Meng, D. Guo, S. Wang, B. Mao and M. Cao,  $\text{Co}_9\text{S}_8@\text{MoS}_2$  core-shell heterostructures as trifunctional electrocatalysts for overall water splitting and Zn-air batteries. *ACS Appl. Mater. Interfaces*, 2018, **10**, 1678-1689.
- [7] S. Zhao, R. Jin, H. Abroshan, C. Zeng, H. Zhang, S. D. House, E. Gottlieb, H. J. Kim, J. C. Yang and R. Jin, Gold nanoclusters promote electrocatalytic water oxidation at the nanocluster/ $\text{CoSe}_2$  interface. *J. Am. Chem. Soc.*, 2017, **139**, 1077-1080.
- [8] J. Liang, Y.-Z. Wang, C.-C. Wang and S.-Y. Lu, *In situ* formation of  $\text{NiO}$  on Ni foam prepared with a novel leaven dough method as an outstanding electrocatalyst for oxygen evolution reactions. *J. Mater. Chem. A*, 2016, **4**, 9797-9806.
- [9] S. C. Jung, S. L. Sim, Y. W. Soon, C. M. Lim, P. Hing and J. R. Jennings, Synthesis of nanostructured  $\beta\text{-Ni}(\text{OH})_2$  by electrochemical dissolution-precipitation and its application as a water oxidation catalyst. *Nanotechnology*, 2016, **27**, 275401.
- [10] Q. Li, X. Wang, K. Tang, M. Wang, C. Wang and C. Yan, Electronic modulation of electrocatalytically active center of  $\text{Cu}_7\text{S}_4$  nanodisks by cobalt-doping for highly efficient oxygen evolution reaction. *ACS Nano*, 2017, **11**, 12230-12239.
- [11] M. Gao, W. Sheng, Z. Zhuang, Q. Fang, S. Gu, J. Jiang and Y. Yan, Efficient water oxidation using nanostructured  $\alpha$ -nickel-hydroxide as an electrocatalyst. *J. Am. Chem. Soc.*, 2014, **136**, 7077-7084.
- [12] Z. Yu, Y. Bai, S. Zhang, Y. Liu, N. Zhang and K. Sun, MOF-directed templating synthesis of hollow nickel-cobalt sulfide with enhanced electrocatalytic activity for

---

oxygen evolution. *Int. J. Hydrogen Energ.*, 2018, **43**, 8815-8823.

[13] X. Wang, F. Li, W. Li, W. Gao, Y. Tang and R. Li, Hollow bimetallic cobalt-based selenide polyhedrons derived from metal-organic framework: an efficient bifunctional electrocatalyst for overall water splitting. *J. Mater. Chem. A*, 2017, **5**, 17982-17989.

[14] J. Q. Zhu, Z. Y. Ren, S. C. Du, Y. Xie, J. Wu, H. Y. Meng, Y. Z. Xue and H. G. Fu, Co-vacancy-rich  $\text{Co}_{1-x}\text{S}$  nanosheets anchored on rGO for high-efficiency oxygen evolution. *Nano Res.*, 2017, **10**, 1819-1831.

[15] S. Huang, Y. Meng, S. He, A. Goswami, Q. Wu, J. Li, S. Tong, T. Asefa and M. Wu, N-, O-, and S-tridoped carbon-encapsulated  $\text{Co}_9\text{S}_8$  nanomaterials: efficient bifunctional electrocatalysts for overall water splitting. *Adv. Funct. Mater.*, 2017, **27**, 1606585.

[16] B. Y. Guan, L. Yu and X. W. Lou, General synthesis of multishell mixed-metal oxyphosphide particles with enhanced electrocatalytic activity in the oxygen evolution reaction. *Angew. Chem. Int. Ed.*, 2017, **56**, 2386-2389.

[17] B. G. Amin, A. T. Swesi, J. Masud and M. Nath,  $\text{CoNi}_2\text{Se}_4$  as an efficient bifunctional electrocatalyst for overall water splitting. *Chem. Commun.*, 2017, **53**, 5412-5415.

[18] J.-J. Lv, J. Zhao, H. Fang, L.-P. Jiang, L.-L. Li, J. Ma and J.-J. Zhu, Incorporating nitrogen-doped graphene quantum dots and  $\text{Ni}_3\text{S}_2$  nanosheets: a synergistic electrocatalyst with highly enhanced activity for overall water splitting. *Small*, 2017, **13**, 1700264.

[19] R. Xu, R. Wu, Y. Shi, J. Zhang and B. Zhang,  $\text{Ni}_3\text{Se}_2$  nanoforest/Ni foam as a hydrophilic, metallic, and self-supported bifunctional electrocatalyst for both  $\text{H}_2$  and  $\text{O}_2$  generations. *Nano Energy*, 2016, **24**, 103-110.

[20] N. Jiang, Q. Tang, M. Sheng, B. You, D.-E. Jiang and Y. Sun, Nickel sulfides for electrocatalytic hydrogen evolution under alkaline conditions: a case study of crystalline  $\text{NiS}$ ,  $\text{NiS}_2$ , and  $\text{Ni}_3\text{S}_2$  nanoparticles. *Catal. Sci. Technol.*, 2016, **6**, 1077-1084.

[21] X. Zhang, H. Xu, X. Li, Y. Li, T. Yang and Y. Liang, Facile synthesis of nickel-iron/nanocarbon hybrids as advanced electrocatalysts for efficient water splitting. *ACS Catal.*, 2016, **6**, 580-588.

[22] H. Zhang, Z. Ma, J. Duan, H. Liu, G. Liu, T. Wang, K. Chang, M. Li, L. Shi, X. Meng, K. Wu and J. Ye, Active sites implanted carbon cages in core-shell architecture: highly active and durable electrocatalyst for hydrogen evolution reaction. *ACS Nano*, 2016, **10**, 684-694.

[23] J. Wang, H. Zhong, Z. Wang F. Meng and X. Zhang, Integrated three-dimensional carbon paper/carbon tubes/cobalt-sulfide sheets as an efficient electrode for overall water splitting. *ACS Nano*, 2016, **10**, 2342-2348.



- 
- [24] J. Tian, Q. Liu, A. M. Asiri and X. Sun, Self-supported nanoporous cobalt phosphide nanowire arrays: an efficient 3D hydrogen-evolving cathode over the wide range of pH 0–14. *J. Am. Chem. Soc.*, 2014, **136**, 7587-7590.
- [25] L.-L. Feng, G. Yu, Y. Wu, G.-D. Li, H. Li, Y. Sun, T. Asefa, W. Chen and X. Zou, High-index faceted Ni<sub>3</sub>S<sub>2</sub> nanosheet arrays as highly active and ultrastable electrocatalysts for water splitting. *J. Am. Chem. Soc.*, 2015, **137**, 14023-14026.
- [26] H. Jin, J. Wang, D. Su, Z. Wei, Z. Pang and Y. Wang, *In situ* cobalt-cobalt oxide/N-doped carbon hybrids as superior bifunctional electrocatalysts for hydrogen and oxygen evolution. *J. Am. Chem. Soc.*, 2015, **137**, 2688-2694.
- [27] Y. Hou, M. R. Lohe, J. Zhang, S. Liu, X. Zhuang and X. Feng, Vertically oriented cobalt selenide/NiFe layered-double-hydroxide nanosheets supported on exfoliated graphene foil: an efficient 3D electrode for overall water splitting. *Energy Environ. Sci.*, 2016, **9**, 478-483.
- [28] J. Liu, Y. Zheng, Y. Jiao, Z. Wang, Z. Lu, A. Vasileff and S.-Z. Qiao, NiO as a bifunctional promoter for RuO<sub>2</sub> toward superior overall water splitting. *Small*, 2018, **14**, 1704073.
- [29] J. Masa, P. Weide, D. Peeters, I. Sinev, W. Xia, Z. Sun, C. Somsen, M. Muhler and W. Schuhmann, Amorphous cobalt boride (Co<sub>2</sub>B) as a highly efficient nonprecious catalyst for electrochemical water splitting: oxygen and hydrogen evolution. *Adv. Energy Mater.*, 2016, **6**, 1502313.
- [30] X. Wu, D. He, H. Zhang, H. Li, Z. Li, B. Yang, Z. Lin, L. Lei and X. Zhang, Ni<sub>0.85</sub>Se as an efficient non-noble bifunctional electrocatalyst for full water splitting. *Int. J. Hydrogen Energy*, 2016, **41**, 10688-10694.
- [31] Y. Yu, P. Li, X. Wang, W. Gao, Z. Shen, Y. Zhu, S. Yang, W. Song and K. Ding, Vanadium nanobelts coated nickel foam 3D bifunctional electrode with excellent catalytic activity and stability for water electrolysis. *Nanoscale*, 2016, **8**, 10731-10738.
- [32] S. Du, Z. Ren, J. Zhang, J. Wu, W. Xi, J. Zhu and H. Fu, Co<sub>3</sub>O<sub>4</sub> nanocrystal ink printed on carbon fiber paper as a large-area electrode for electrochemical water splitting. *Chem. Commun.*, 2015, **51**, 8066-8069.
- [33] H. Wang, Y. Cao, C. Sun, G. Zou, J. Huang, X. Kuai, J. Zhao and L. Gao, Strongly coupled molybdenum carbide on carbon sheets as a bifunctional electrocatalyst for overall water splitting. *ChemSusChem*, 2017, **10**, 3540-3546.
- [34] X. Yan, L. Tian, S. Atkins, Y. Liu, J. Murowchick and X. Chen, Converting CoMoO<sub>4</sub> into CoO/MoO<sub>x</sub> for overall water splitting by hydrogenation. *ACS Sustainable Chem. Eng.*, 2016, **4**, 3743-3749.
- [35] H. Liang, L. Li, F. Meng, L. Dang, J. Zhuo, A. Forticaux, Z. Wang and S. Jin, Porous two-dimensional nanosheets converted from layered double hydroxides and their applications in electrocatalytic water splitting. *Chem. Mater.*, 2015, **27**, 5702-5711.

- 
- [36] Z. Peng, D. Jia, A. M. Al-Enizi, A. A. Elzatahry and G. Zheng, From water oxidation to reduction: homologous Ni-Co based nanowires as complementary water splitting electrocatalysts. *Adv. Energy Mater.*, 2015, **5**, 1402031.
- [37] C. Tang, N. Cheng, Z. Pu, W. Xing, X. Sun, NiSe nanowire film supported on nickel foam: an efficient and stable 3D bifunctional electrode for full water splitting. *Angew. Chem. Int. Ed.*, 2015, **54**, 9351-9355.
- [38] A. Sivanantham, P. Ganesan and S. Shanmugam, Hierarchical NiCo<sub>2</sub>S<sub>4</sub> nanowire arrays supported on Ni foam: an efficient and durable bifunctional electrocatalyst for oxygen and hydrogen evolution reactions. *Adv Funct Mater*, 2016, **26**, 4661-4672.
- [39] K. Xiao, L. Zhou, M. Shao and M. Wei, Fabrication of (Ni,Co)<sub>0.85</sub>Se nanosheet arrays derived from layered double hydroxides toward largely enhanced overall water splitting. *J. Mater. Chem. A*, 2018, **6**, 7585-7591.
- [40] D. Liu, Q. Lu, Y. Luo, X. Sun and A. M. Asiri, NiCo<sub>2</sub>S<sub>4</sub> nanowires array as an efficient bifunctional electrocatalyst for full water splitting with superior activity. *Nanoscale*, 2015, **7**, 15122-15126.
